# Supplementary material for: Reading and Math Achievement in Children With Dyslexia, Developmental Language Disorder, or Typical Development: Achievement Gaps Persist From Second Through Fourth Grades
Source: PubMed Central journal article supplement — J Learn Disabil. 2022 Jun 21;56(5):371–91. doi: 10.1177/00222194221105515 (PMC10426256; doi:10.1177/00222194221105515), 2022-06-21

**Figure S5.** Growth Curves Depicting Students' Predicted MAP scores in (A) Reading and (B) Math from Second Grade to Fourth Grade by Classification Group. This figure is a full color version of Figure 1 included in the main article document. Gray shading indicates the 95% confidence interval around the predicted MAP scores for each group.

**Article Title:** Reading and Math Achievement in Children with Dyslexia, Developmental Language Disorder, or Typical Development: Achievement Gaps Persist from Second through Fourth Grades

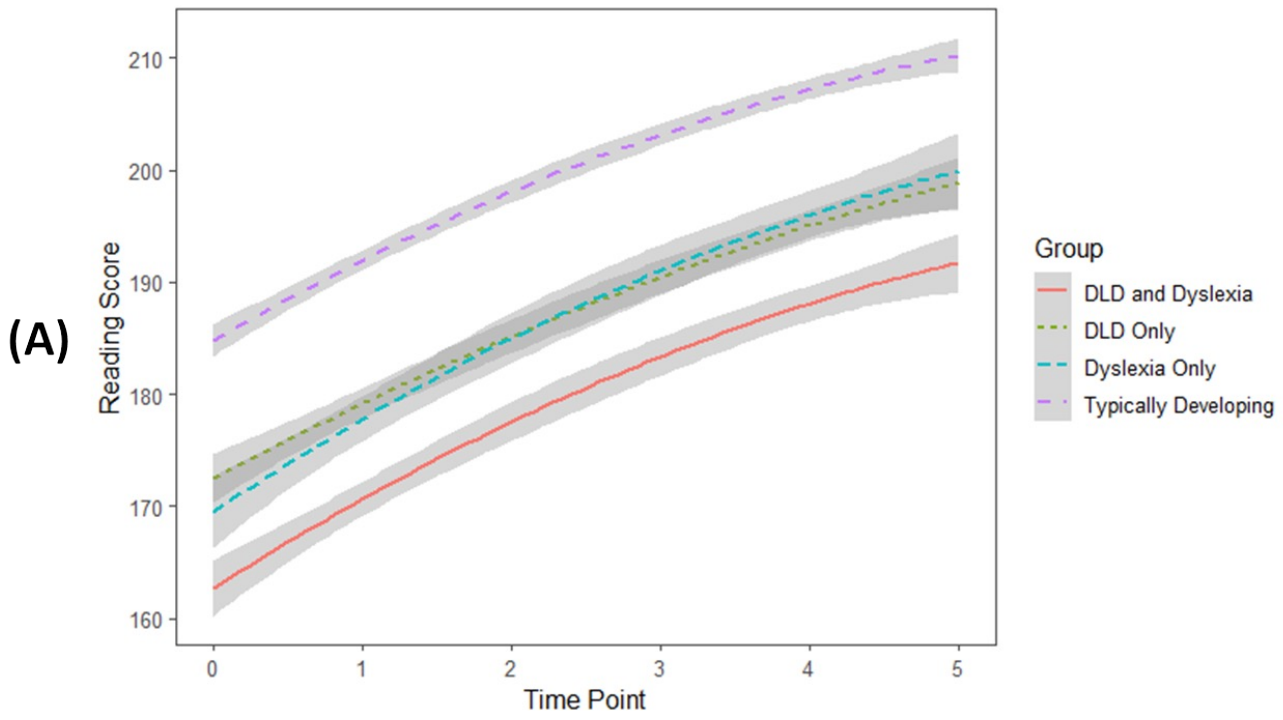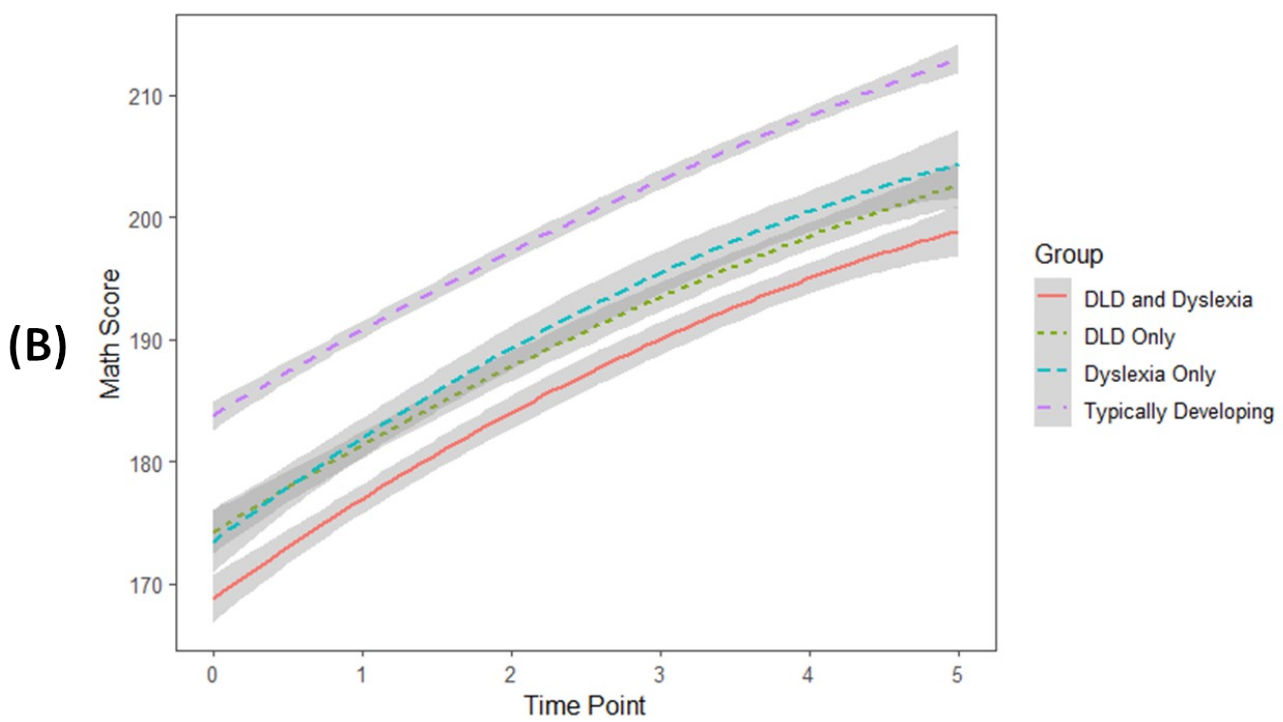

Supplement: sj-pdf-5-ldx-10.1177_00222194221105515.pdf [file sj-pdf-5-ldx-10.1177_00222194221105515.pdf]
